# Supplementary material
Source: MDPI journal article supplement (https://www.mdpi.com/2076-3298/6/9/102)

Supplementary Information 1. Flow chart illustrating sample management and analytical measurements during the chronic experiment.

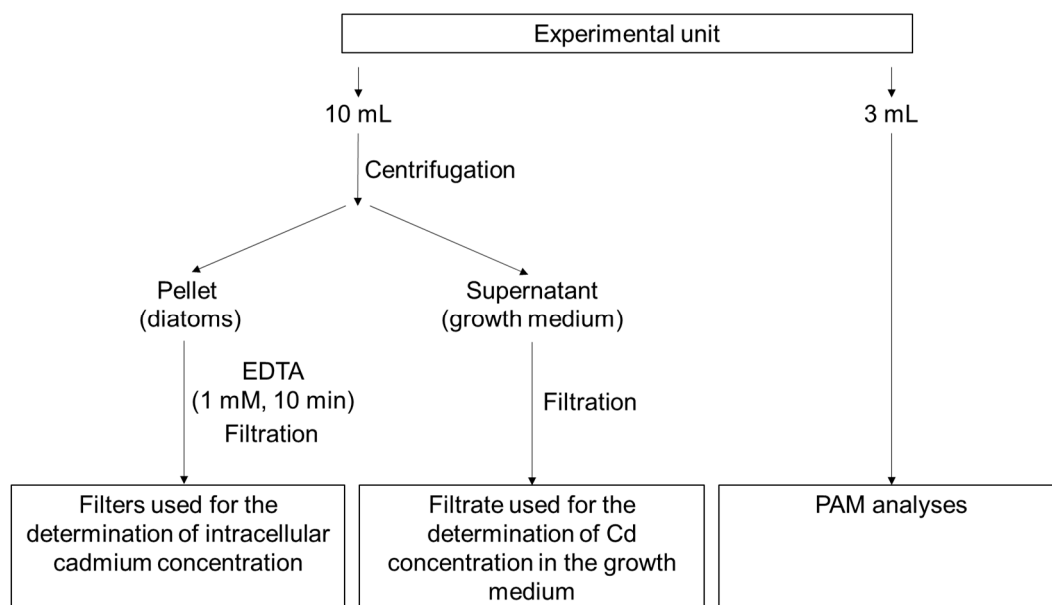

Supplement: s1 [file s1]
